# Supplementary material for: Randomized Controlled Trial of a Mobile Phone Intervention for Improving Adherence to Naltrexone for Alcohol Use Disorders
Source: PLOS journal article supplement (doi:10.1371/journal.pone.0124613), 2015-04-24

# Alcohol and Side Effects Assessment

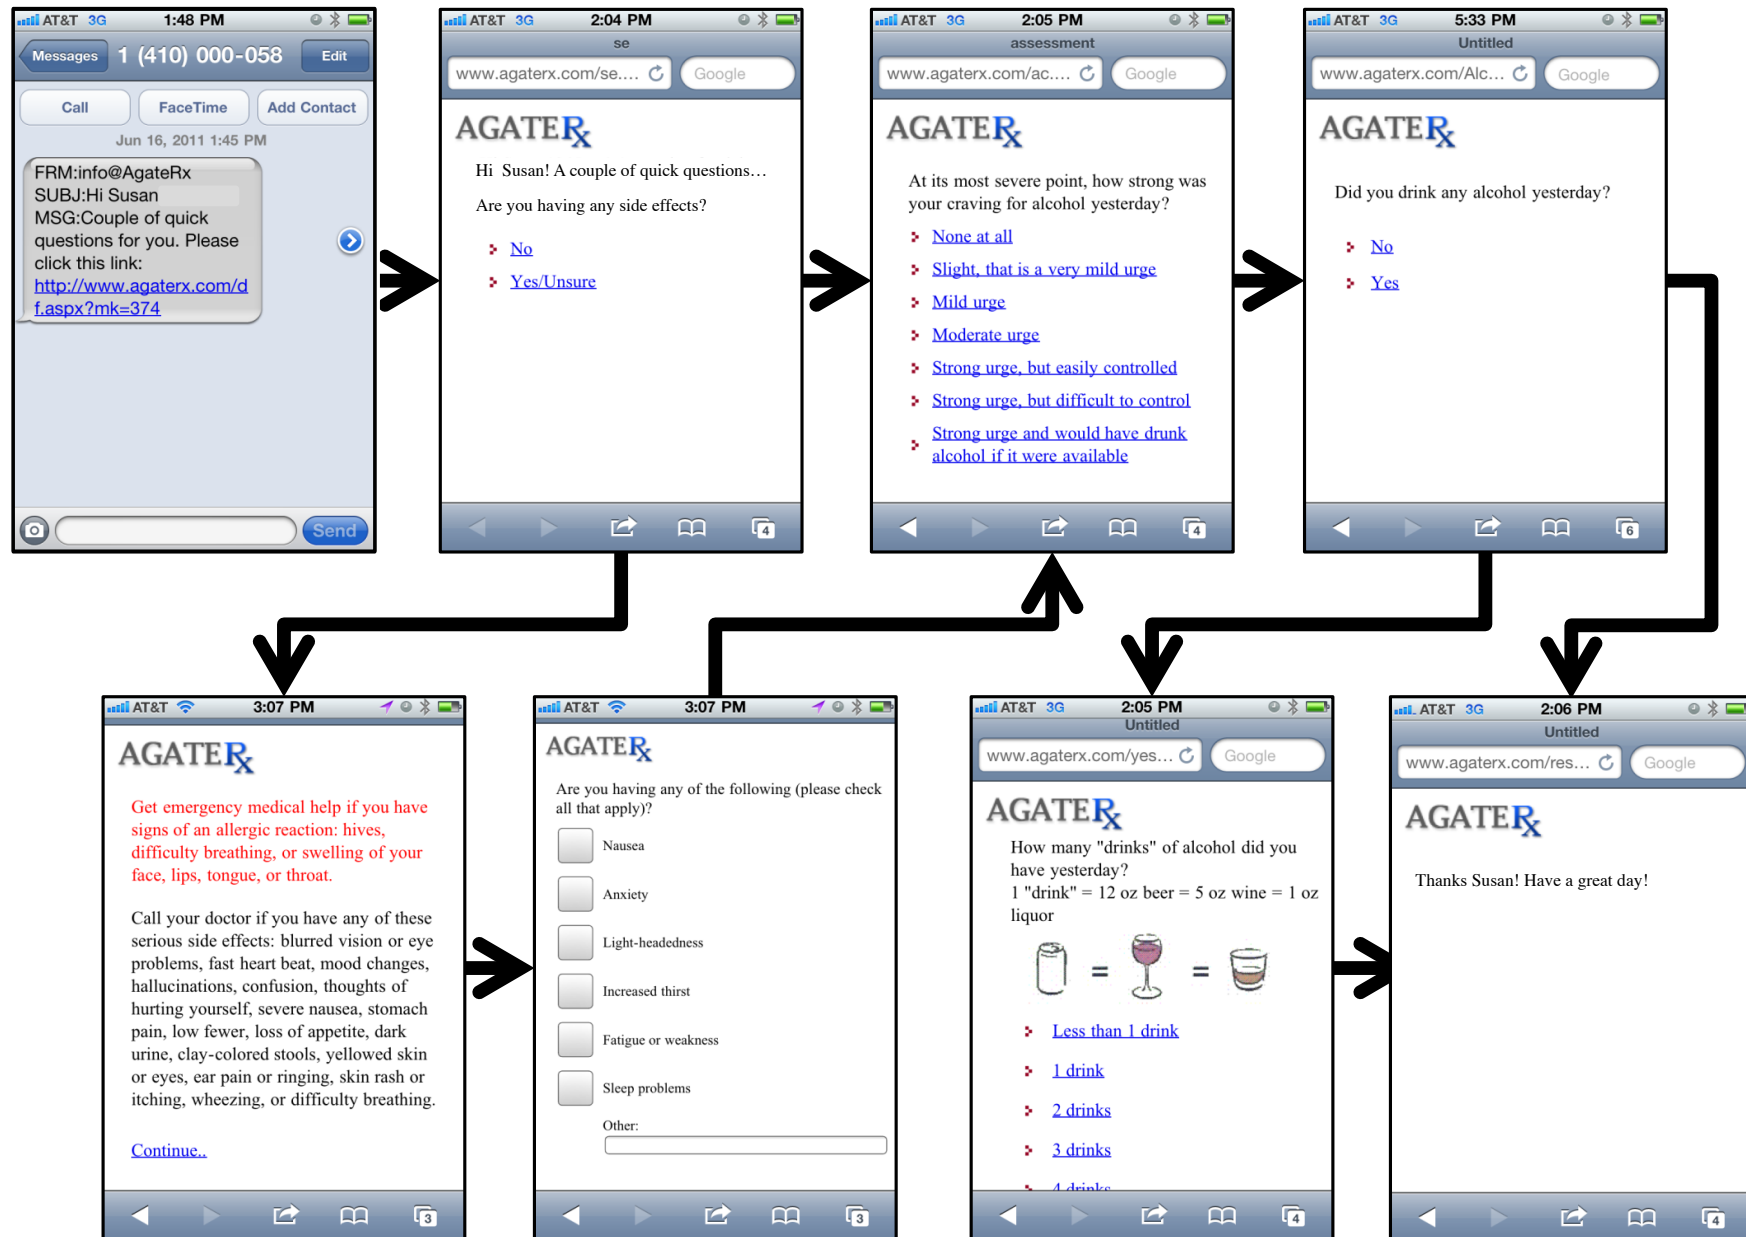

# Message and Adherence Assessment

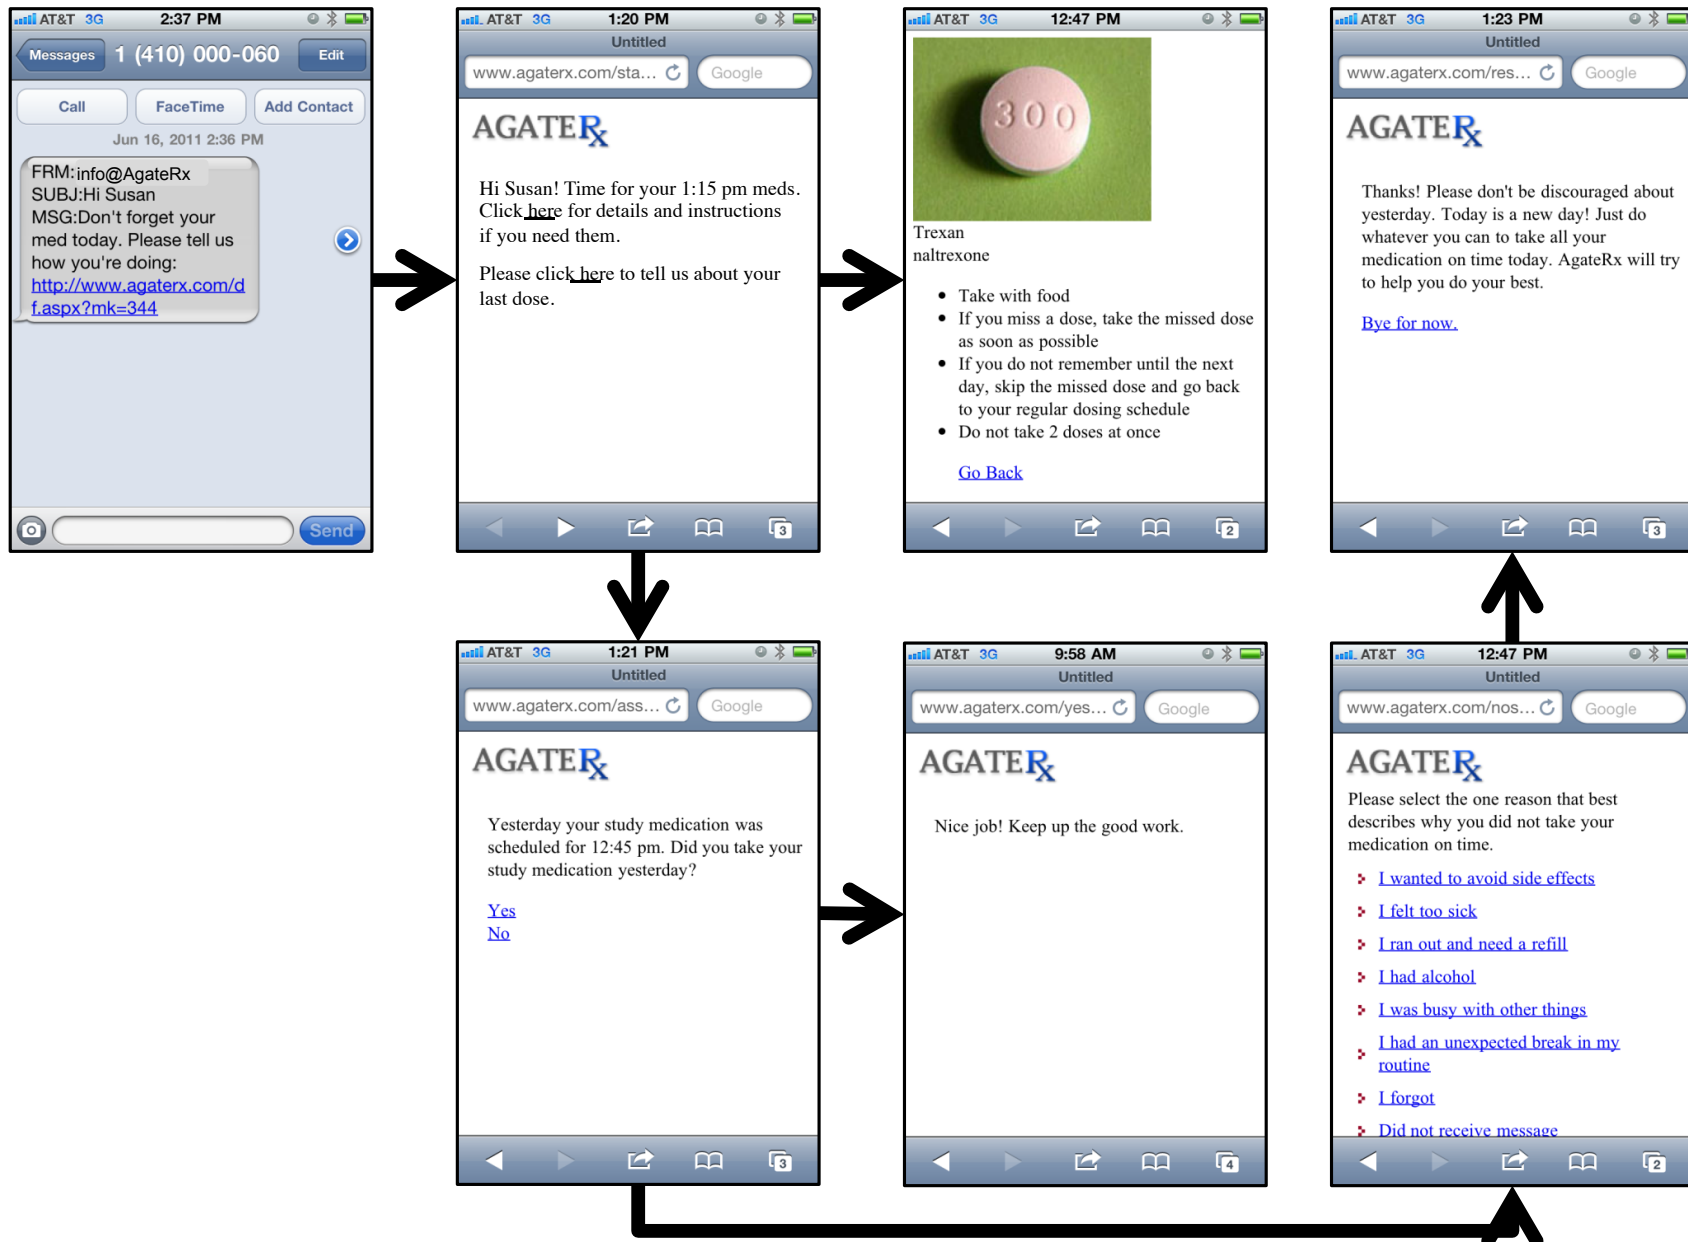

Supplement: S4 (10.1371/journal.pone.0124613.s004) [file journal.pone.0124613.s004]
